# Supplementary material for: Evolution of female promiscuity in Passerides songbirds
Source: BMC Evol Biol. 2019 Aug 14;19:169. doi: 10.1186/s12862-019-1493-1 (PMC6694576; doi:10.1186/s12862-019-1493-1)
Supplement: Supplementary file 6 — The model selection approach, using AIC, to find the best multivariate PGLS model as presented in Table 2. (XLSX 13 kb) [file 12862_2019_1493_MOESM6_ESM.xlsx]

## Sheet: Ark1
These univariate and multivariate tests were performed using a single consensus phylogeny - the MCC tree.
Univariate tests:
	Mean Female Promiscuity
	all available data					full data coverage
predictor	df	λ	estimate	adj. R2	P	df	λ	estimate	adj. R2	P
body size	175	0.694	-0.036825	-0.005391	0.8127	153	0.714	-0.075624	-0.00513	0.6443
chick feeding	172	0.617	-0.23949	0.007587	0.1293	153	0.695	-0.3002	0.01272	0.08607
cooperative breeding	175	0.691	-0.015739	-0.005458	0.8329	153	0.713	-0.001089	-0.006535	0.9888
female plumage	198	0.694	-0.036124	0.02243	0.01929	153	0.664	-0.044465	0.03341	0.01295
incubation	179	0.497	-0.30768	0.02901	0.01243	153	0.608	-0.27776	0.02272	0.03392
latitude	200	0.761	0.001273	-0.00465	0.7921	153	0.705	0.0034351	-0.004675	0.5952
male plumage	198	0.784	0.01444	0.003397	0.1967	153	0.731	0.016811	0.005082	0.1833
migration	175	0.604	0.234857	0.0431	0.003212	153	0.636	0.251775	0.04534	0.004502
migration distance	200	0.766	0.047031	0.00247	0.2225	153	0.691	0.059679	0.007254	0.1469
migration distance2	199	0.711	-0.03963	0.03412	0.006926	153	0.604	-0.05171	0.07115	0.0009699
nest building	171	0.594	-0.399068	0.08139	8.386e-05	153	0.63	-0.35884	0.05907	0.001345
plumage dimorphism	198	0.751	0.030104	0.03415	0.005063	153	0.714	0.033381	0.04567	0.004373
sexual selection	175	0.655	0.23595	0.02653	0.0171	153	0.668	0.21872	0.01936	0.04618
social bond	200	0.723	-0.36838	0.02407	0.015524	153	0.638	-0.53446	0.05274	0.002347
tropical life history	175	0.649	-0.17593	0.01494	0.05705	153	0.675	-0.19825	0.01139	0.09782
tropical/temperate	200	0.734	0.2673	0.002607	0.2183	153	0.639	0.5454	0.01401	0.07615
Model selection is performed by starting with all predictors, then dropping the covariate with the highest p-value one by one until all are <0.05, and comparing all resulting models with AIC.
multivariate model selection (mean female promiscuity)
df	AIC	predictors
8	445.699	Migration_distance+I(Migration_distance^2)+nest_building+Plumage_dimorphism+Tropical_temperate+Latitude+Social_bond
9	446.123	Tropical_life_history+Migration_distance+I(Migration_distance^2)+nest_building+Plumage_dimorphism+Tropical_temperate+Latitude+Social_bond
7	446.144	Migration_distance+I(Migration_distance^2)+nest_building+Plumage_dimorphism+Tropical_temperate+Social_bond
10	446.196	Tropical_life_history+Migration_distance+I(Migration_distance^2)+nest_building+incubation+Plumage_dimorphism+Tropical_temperate+Latitude+Social_bond
6	446.352	Migration_distance+I(Migration_distance^2)+nest_building+Plumage_dimorphism+Social_bond
11	447.626	Tropical_life_history+Female_plumage+Migration_distance+I(Migration_distance^2)+nest_building+incubation+Plumage_dimorphism+Tropical_temperate+Latitude+Social_bond
12	449.414	Tropical_life_history+Body_size+Female_plumage+Migration_distance+I(Migration_distance^2)+nest_building+incubation+Plumage_dimorphism+Tropical_temperate+Latitude+Social_bond
13	451.277	Tropical_life_history+Body_size+Female_plumage+chick_feeding+Migration_distance+I(Migration_distance^2)+nest_building+incubation+Plumage_dimorphism+Tropical_temperate+Latitude+Social_bond
14	453.2	Tropical_life_history+Body_size+Female_plumage+chick_feeding+Migration_distance+I(Migration_distance^2)+Migration+nest_building+incubation+Plumage_dimorphism+Tropical_temperate+Latitude+Social_bond
15	455.153	Tropical_life_history+Body_size+Female_plumage+chick_feeding+Migration_distance+I(Migration_distance^2)+Migration+nest_building+incubation+Plumage_dimorphism+Sexual_selection+Tropical_temperate+Latitude+Social_bond
16	457.149	Cooperative_breeding+Tropical_life_history+Body_size+Female_plumage+chick_feeding+Migration_distance+I(Migration_distance^2)+Migration+nest_building+incubation+Plumage_dimorphism+Sexual_selection+Tropical_temperate+Latitude+Social_bond
